# Supplementary material for: Organ culture storage of pre-prepared corneal donor material for Descemet's membrane endothelial keratoplasty
Source: PubMed Central journal article supplement (PMC5136687; doi:10.1136/bjophthalmol-2016-308855), 2016-08-19
Supplement: bjophthalmol-2016-308855supp_table1.pdf [file bjophthalmol-2016-308855supp_table1.pdf]

|                                            | Media                                                                       |                |        |
|--------------------------------------------|-----------------------------------------------------------------------------|----------------|--------|
|                                            | Standard (n=8)                                                              | Enhanced (n=8) |        |
| Donor Age                                  | 68.8±11.4                                                                   |                |        |
| Death to storage time                      | 26.4±10.3                                                                   |                |        |
| Time in Organ Culture                      | 33 days                                                                     |                |        |
| Cause of Death                             | Respiratory failure (2),<br>Cerebrovascular accident (3),<br>Malignancy (3) |                |        |
| Donors with diabetes                       | 2 (1CVA, 1 Respiratory failure)                                             |                |        |
| ECD prior to experimentation               | 1833± 155 cells/mm <sup>2</sup>                                             |                |        |
| Unwounded ECD (cells/mm <sup>2</sup> ±STD) | 1364 ± 170                                                                  | 1540 ± 209     | p=0.19 |
| Wounded ECD (cells/mm <sup>2</sup> ±STD)   | 719 ± 150                                                                   | 863 ± 166      | p=0.09 |
|                                            | p<0.001                                                                     | p<0.001        |        |

*Supplementary Table 1) Graft characteristics and endothelial cell of grafts stored in standard and enhanced culture media.*
