# Supplementary material for: Organ culture storage of pre-prepared corneal donor material for Descemet's membrane endothelial keratoplasty
Source: PubMed Central journal article supplement (PMC5136687; doi:10.1136/bjophthalmol-2016-308855), 2016-08-19
Supplement: bjophthalmol-2016-308855supp_table2.pdf [file bjophthalmol-2016-308855supp_table2.pdf]

| Condition                            | % of samples with Endothelial Overgrowth (N) |          |          | Comments                                                    |
|--------------------------------------|----------------------------------------------|----------|----------|-------------------------------------------------------------|
|                                      | Day 2                                        | Day 4    | Day 8    |                                                             |
| Free Scroll (standard OC)            | 0% (4)                                       | 0% (4)   | 50% (4)  | Few actin stress fibers, circular cells                     |
| Free Scroll (enhanced OC)            | 100% (4)                                     | 100% (4) | 100% (4) | Flat cells with multiple extensions and excessive migration |
| Peel and lay on stroma (standard OC) | 50% (4)                                      | 100% (4) | -        | Flat cells with multiple extensions and excessive migration |
| Bubble (standard OC)                 | 0% (2)                                       | 0% (2)   | 0% (4)   | No cell overgrowth                                          |

*Supplementary Table 2) Time point at which endothelial overgrowth was observed.*

*(N) refers to the number of samples in each group. OC = organ culture medium.*
